# Supplementary material for: Insulin and the insulin receptor collaborate to promote human gastric cancer
Source: PubMed Central journal article supplement (PMC8732810; doi:10.1007/s10120-021-01236-y), 2021-09-23
Supplement: 10120_2021_1236_MOESM1_ESM.pdf [file 10120_2021_1236_MOESM1_ESM.pdf]

**Supplementary Table. Affinities of insulin, IGF-1 and IGF-2 for all possible homodimers and heterodimers between isoform A (IR-A) and isoform B (IR-B) of the insulin receptor and the type I IGF receptor (IGF-IR).**

| Ligand  | IR-B:IR-B           | IR-A:IR-A | IR-B:IR-A | IGF-1R:IGF-1R | IR-B:IGF-1R | IR-A:IGF-1R |
|---------|---------------------|-----------|-----------|---------------|-------------|-------------|
| Insulin | 0.5 nM <sup>§</sup> | 0.25 nM   | 0.5 nM    | 100 nM        | 80 nM       | 70 nM*      |
| IGF-1   | 100 nM              | 10 nM     | 40 nM     | 0.2 nM        | 0.3 nM      | 0.4 nM      |
| IGF-2   | 10 nM               | 2 nM      | 10 nM     | 0.5 nM        | 0.5 nM      | 0.7 nM      |

<sup>§</sup> Affinities [1] were taken from or estimated from original sources. [2-7] \*The affinities measured by different methods for the heterodimer between isoform A of the insulin receptor and the type 1 IGF receptor are somewhat discrepant.

**Supplementary References**

1. Westley RL, May FEB. A Twenty-First Century Cancer Epidemic Caused by Obesity: The Involvement of Insulin, Diabetes, and Insulin-Like Growth Factors. *International Journal of Endocrinology*. 2013.
2. Frasca F, Pandini C, Scalia P, Sciacca L, Mineo R, Costantino A, et al. Insulin receptor isoform A, a newly recognized, high-affinity insulin-like growth factor II receptor in fetal and cancer cells. *Molecular and Cellular Biology*. 1999;19(5):3278-88.
3. Belfiore A, Malaguarnera R. Insulin receptor and cancer. *Endocr Relat Cancer*. 2011;18(4):R125-47.
4. Benyoucef S, Surinya KH, Hadaschik D, Siddle K. Characterization of insulin/IGF hybrid receptors: contributions of the insulin receptor L2 and Fn1 domains and the alternatively spliced exon 11 sequence to ligand binding and receptor activation. *Biochem J*. 2007;403(3):603-13.
5. Yamaguchi Y, Flier JS, Benecke H, Ransil BJ, Moller DE. Ligand-binding properties of the two isoforms of the human insulin receptor. *Endocrinology*. 1993;132(3):1132-8.
6. Pandini G, Vigneri R, Costantino A, Frasca F, Ippolito A, Fujita-Yamaguchi Y, et al. Insulin and insulin-like growth factor-I (IGF-I) receptor overexpression in breast cancers leads to insulin/IGF-I hybrid receptor overexpression: evidence for a second mechanism of IGF-I signaling. *Clin Cancer Res*. 1999;5(7):1935-44.
7. Pandini G, Frasca F, Mineo R, Sciacca L, Vigneri R, Belfiore A. Insulin/insulin-like growth factor I hybrid receptors have different biological characteristics depending on the insulin receptor isoform involved. *J Biol Chem*. 2002;277(42):39684-95.
